# Supplementary material
Source: MDPI journal article supplement (https://www.mdpi.com/2073-4344/12/3/272)
Supplement: s1 [file s1]

# ZnO/ZnS-Polyvinyl Alcohol Hydrogel for Photocatalytic H<sub>2</sub>-Generation

Valeriia Poliukhova<sup>1,2†</sup>, Wenwei Lei<sup>3†</sup>, Sovann Khan<sup>4,5\*</sup>, Eunju Lee Tae<sup>1</sup>, Norihiro Suzuki<sup>4,6</sup>, Chiaki Terashima<sup>4,6,7</sup>, Akira Fujishima<sup>4</sup>, Ken-Ichi Katsumata<sup>4,6,8\*</sup> and So-Hye Cho<sup>1,2\*</sup>

**Citation:** Poliukhova, V.; Lei, W.; Khan, S.; Tae, E.L.; Suzuki, N.; Terashima, C.; Fujishima, A.; Katsumata, K.-I.; Cho, S.-H. ZnO/ZnS-Polyvinyl Alcohol Hydrogel for Photocatalytic H<sub>2</sub>-Generation. *Catalysts* **2022**, *12*, 272. <https://doi.org/10.3390/catal12030272>

Academic Editors: María Victoria Navarro and Valérie Caps

Received: 12 November 2021

Accepted: 21 February 2022

Published: 28 February 2022

**Publisher's Note:** MDPI stays neutral with regard to jurisdictional claims in published maps and institutional affiliations.

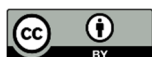

**Copyright:** © 2022 by the authors. Submitted for possible open access publication under the terms and conditions of the Creative Commons Attribution (CC BY) license (<http://creativecommons.org/licenses/by/4.0/>).

- <sup>1</sup> Materials Architecturing Research Center, Korea Institute of Science & Technology, 5 Hwarang-ro 14-gil, Seongbuk-gu, Seoul 02792, Republic of Korea; lerapo777@kist.re.kr (V.P.); sohyec@kist.re.kr (S.-H.C.); 024648@kist.re.kr (E.L.T.)
- <sup>2</sup> Division of Nano & Information Technology, KIST School, Korea University of Science and Technology, 217 Gajeong-ro Yuseong-gu, Daejeon, 34113, Republic of Korea; lerapo777@kist.re.kr (V.P.); sohyec@kist.re.kr (S.-H.C.)
- <sup>3</sup> School of Environmental and Chemical Engineering, Yanshan University, Qinhuangdao 066004, Hebei, China; wenwei1987@163.com (W.L.)
- <sup>4</sup> Photocatalysis International Research Center, Tokyo University of Science, 2641 Yamazaki, Noda-shi, Chiba 278-8510, Japan; khan.sovann.455@m.kyushu-u.ac.jp (S.K.); suzuki.norihiro@rs.tus.ac.jp (N.S.); terashima@rs.tus.ac.jp (C.T.); fujishima\_akira@rs.tus.ac.jp (A.F.); k.katsumata@rs.tus.ac.jp (K. K.)
- <sup>5</sup> International Institute for Carbon Neutral Energy Research (WPI-ICNER), Kyushu University, Motooka 744, Nishi-ku, Fukuoka 819-0395, Japan; khan.sovann.455@m.kyushu-u.ac.jp (S.K.)
- <sup>6</sup> Research Center for Space Colony, Tokyo University of Science, 2641 Yamazaki, Noda-shi, Chiba 278-8510, Japan; suzuki.norihiro@rs.tus.ac.jp (N.S.); terashima@rs.tus.ac.jp (C.T.); k.katsumata@rs.tus.ac.jp (K. K.)
- <sup>7</sup> Research Initiative for Supra-Materials, Shinshu University, Wakasato, Nagano 380-8553, Japan; terashima@rs.tus.ac.jp (C.T.);
- <sup>8</sup> Department of Materials Science and Technology, Faculty of Industrial Science and Technology, Tokyo University of Science, 6-3-1 Niijuku, Katsushika-ku, Tokyo 125-8585, Japan; k.katsumata@rs.tus.ac.jp (K. K.)
- \* Correspondence: khan.sovann.455@m.kyushu-u.ac.jp (S. K.); sohyec@kist.re.kr (S.-H. C.), and k.katsumata@rs.tus.ac.jp (K. K.)
- † These authors contributed equally.

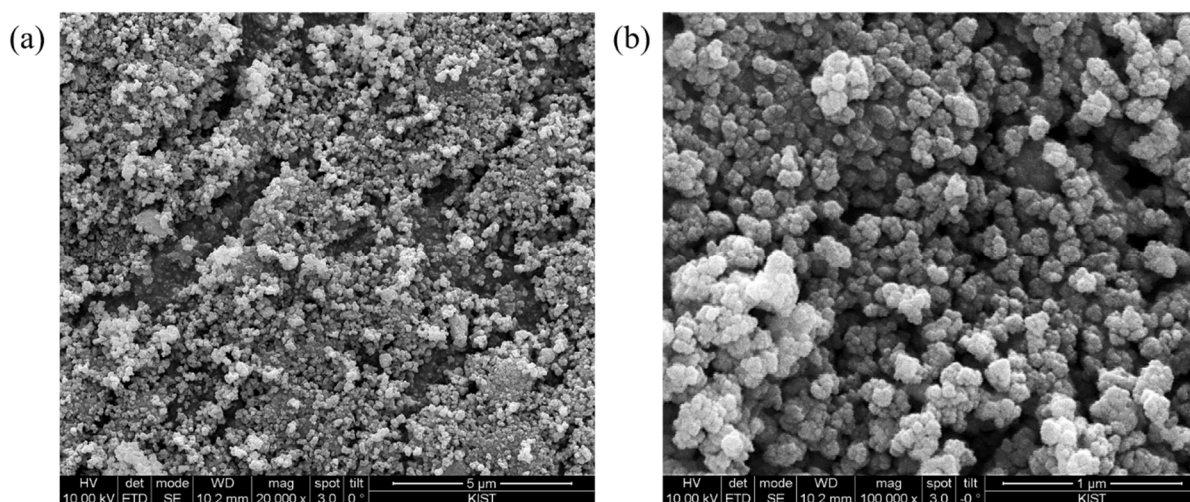

**Figure S1.** SEM images of ZnOS nanoparticles at (a) low resolution and (b) high resolution.

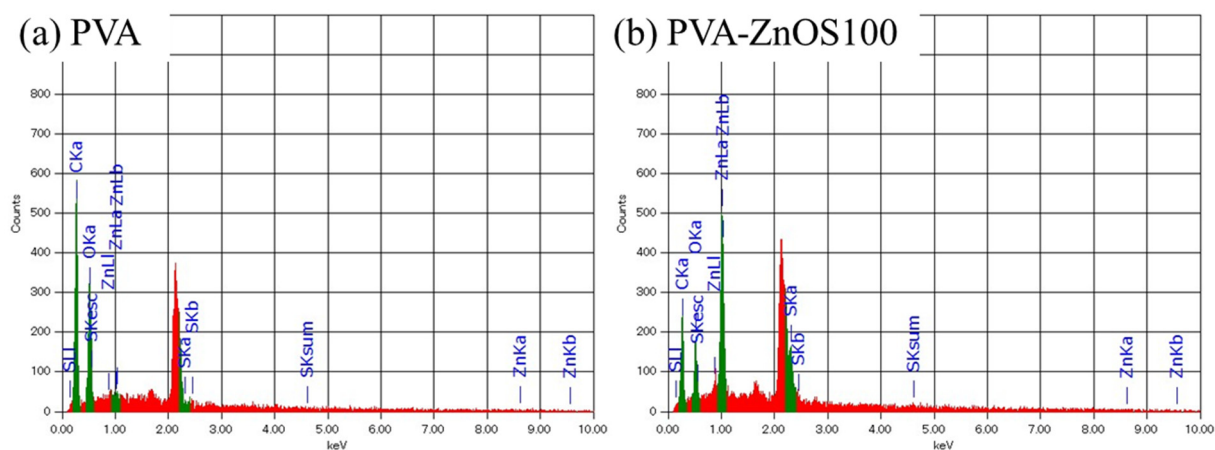

**Figure S2.** EDS spectra of (a) pure PVA and (b) PVA-ZnOS100 composite.

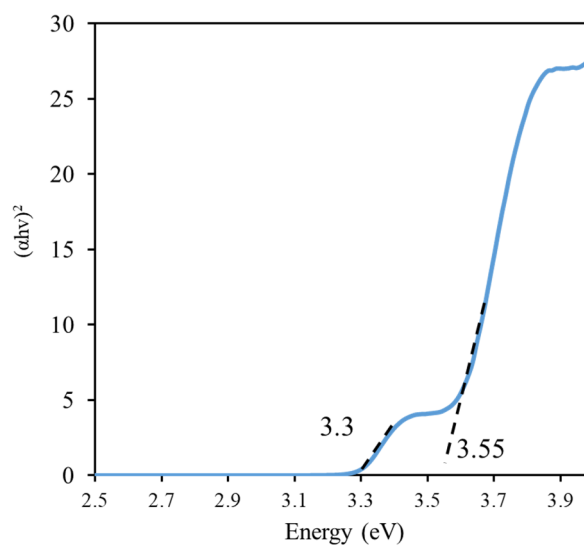

**Figure S3.** Bandgap energy from Tauc plot obtained from UV-vis absorption spectrum of ZnOS.

**Table S1.** Decomposition temperature and weight loss (W.L.) obtained from TGA analysis.

| Sample      | Stage 1   |          | Stage 2   |          | Stage 3   |           | Residual (%) | Particle (%) |
|-------------|-----------|----------|-----------|----------|-----------|-----------|--------------|--------------|
|             | Tem. (°C) | W.L. (%) | Tem. (°C) | W.L. (%) | Tem. (°C) | W. L. (%) |              |              |
| PVA         | <212      | 5        | 212-371   | 79       | 412-460   | 15        | 1            | 0            |
| PVA-ZnOS100 | <159      | 5        | 159-335   | 63       | 405-452   | 27.07     | 4.93         | 3.93         |
| PVA-ZnOS150 | <159      | 5        | 159-258   | 56       | 345-488   | 30.48     | 8.52         | 7.52         |
| PVA-ZnOS200 | <212      | 5        | 212-269   | 55       | 351-485   | 29.17     | 10.83        | 9.83         |

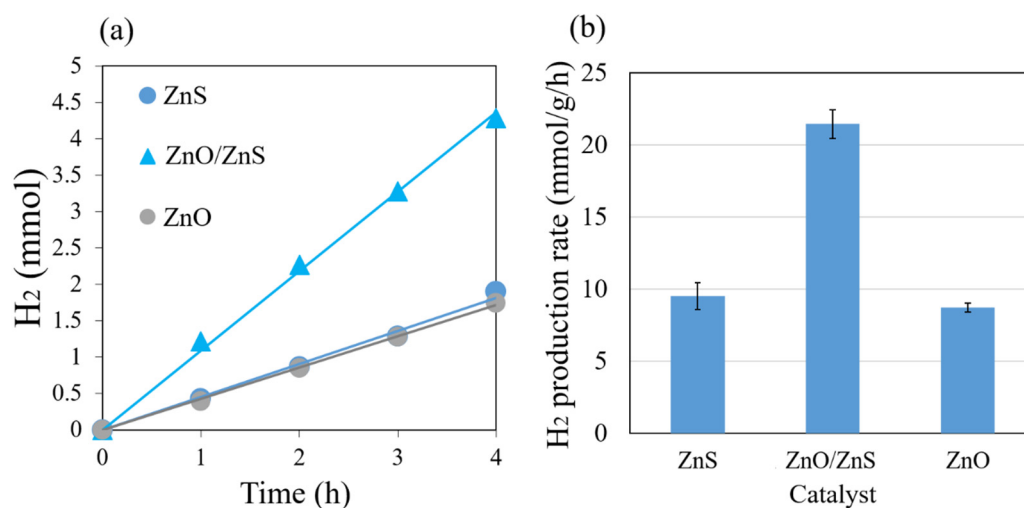**Figure S4.** (a) H<sub>2</sub> generation as a function of radiation time from ZnS, ZnO/ZnS, and ZnO nanoparticles; (b) average production rate of H<sub>2</sub> of all samples under the UV light irradiation.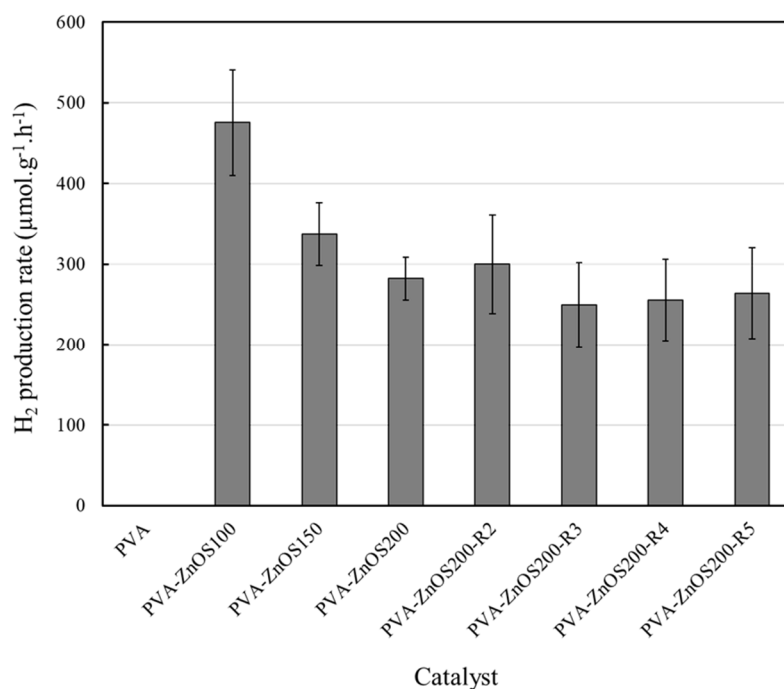**Figure S5.** Hydrogen production rates in μmol.g<sup>-1</sup>.h<sup>-1</sup>.

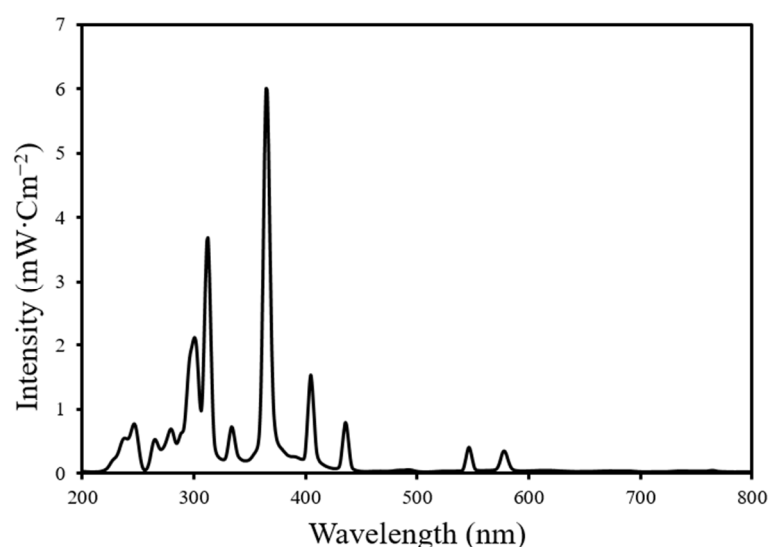

**Figure S6.** Radiation spectrum of Xe-Hg lamp used in this experiment.

**Table S2.** Photocatalytic activities for H<sub>2</sub> generation with previous reports (for comparison, production rates were normalized per gram catalyst).

| Materials                                              | Reaction                                                                                              | Catalyst (mg)/Solution (mL) | H <sub>2</sub> rate (μmol·g <sup>-1</sup> ·h <sup>-1</sup> ) | Recyclability     | Ref       |
|--------------------------------------------------------|-------------------------------------------------------------------------------------------------------|-----------------------------|--------------------------------------------------------------|-------------------|-----------|
| PVA-ZnOS-100                                           | Xe-Hg lamp, (200~400 nm = 146 mW·cm <sup>-2</sup> )/Na <sub>2</sub> S-Na <sub>2</sub> SO <sub>3</sub> | 33/50                       | 475                                                          | Separation free   | This work |
| PVA-ZnOS-150                                           |                                                                                                       | 50/50                       | 337                                                          |                   |           |
| PVA-ZnOS-200                                           |                                                                                                       | 66/50                       | 282                                                          |                   |           |
| PVA-ZnOS-200-R5                                        |                                                                                                       | 66/50                       | 263                                                          |                   |           |
| CdS/HGel <sub>PDA</sub> M                              | 450 W Hg -lamp (>380 nm)/ Na <sub>2</sub> S-Na <sub>2</sub> SO <sub>3</sub>                           | 5/11                        | 7700                                                         | Separation needed | [1]       |
| Pt/CdS/SiO <sub>2</sub> /PANI                          | 500 W Xe-lamp (>320 nm, 80 mW·cm <sup>-2</sup> )/Lactic acid                                          | 15/30                       | 14160                                                        | NA                | [2]       |
| Pt/C <sub>3</sub> N <sub>4</sub> /polymer hydrogel     | 300 W Xe-lamp (0.7 mW·cm <sup>-2</sup> at 420 nm)/TEOA                                                | 10/100                      | 7427                                                         | Separation free   | [3]       |
| Pt/Ag-C <sub>3</sub> N <sub>4</sub> /melamine hydrogel | 300 W Xe-lamp (>420 nm)/TEOA                                                                          | 50/100                      | 625                                                          | NA                | [4]       |
| Pt/N-TiO <sub>2</sub> /SrTiO <sub>3</sub> /PVA         | Xe-lamp (312 W·m <sup>-2</sup> )/methanol                                                             | NA/50                       | 34895                                                        | NA                | [5]       |

For comparison, we have selected recent works related to polymer hydrogel photocatalysts for hydrogen generation and summarized their hydrogen production rates in Table S2. Li et al. prepared CdS embedded into dimethylaminoethyl methacrylate/acrylamine hydrogel (CdS/HGel<sub>PDA</sub>M) and used it for H<sub>2</sub> generation from an Na<sub>2</sub>S/Na<sub>2</sub>SO<sub>3</sub> solution under UV from a Hg-lamp. The hydrogen production rate was up to 7700 μmol·g<sup>-1</sup>·h<sup>-1</sup>, which is much higher than our samples. Since no light intensity was reported there, we are unsure how intense their light was [1].

Lu et al. synthesized composite structure of CdS nanorod-SiO<sub>2</sub> photocatalyst embedded into polyaniline hydrogel (Pt/CdS/SiO<sub>2</sub>/PANI) and performed photocatalytic H<sub>2</sub>-generation from lactic acid solution with Pt as a cocatalyst under a Xe-lamp. The production rate was very high: ~14160 μmol·g<sup>-1</sup>·h<sup>-1</sup>. This extremely high hydrogen production rate was mainly due to the noble cocatalyst [2]. Although these catalysts showed greater activity in hydrogen generation, the use of an expensive cocatalyst and the toxicity of CdS are not good choices for industrial production.

Lei et al. loaded Pt atoms on C<sub>3</sub>N<sub>4</sub> nanosheets and embedded them into polymer hydrogel (N-Isopropylacrylamide/N,N'-methylene bisacrylamine/sodium alginate). Photocatalytic H<sub>2</sub>-generation was performed from triethanolamine (TEOA) solution under Xe-lamp with low intensity (0.7 mW·cm<sup>-2</sup>). The hydrogen production rate was ~7427 μmol·g<sup>-1</sup>·h<sup>-1</sup>. Hydrogel catalyst was used in film/gel and no separation was needed. Their hydrogel activity was much better than ours. However, noble metal was

still used in this work [3]. Wang et al. synthesized Ag/g- C<sub>3</sub>N<sub>4</sub> melamine hydrogel composite. Photocatalytic H<sub>2</sub>-generation performed well under visible light (>420 nm) with a Pt cocatalyst. The hydrogen production rate was 625  $\mu\text{mol}\cdot\text{g}^{-1}\cdot\text{h}^{-1}$ . Although performance was high, noble metals such as Ag and Pt were not unavoidable. Furthermore, the catalyst used in the form of dry powder would require a process for separation [4].

Recently, Lee et al. prepared a complex compound composed of N-doped TiO<sub>2</sub>/SrTiO<sub>3</sub> loaded Pt cocatalyst and embedded it into the PVA matrix. Photocatalytic H<sub>2</sub>-generation was performed in methanol solution under Xe-lamp, and the H<sub>2</sub>-production rate was up to 34895  $\mu\text{mol}\cdot\text{g}^{-1}\cdot\text{h}^{-1}$ . It should be outstanding hydrogel-support catalyst compounds among selected works. However, multi-steps to synthesize this complex catalyst structure and the expensive metals required would not be eligible to compare with our samples. Although our sample produced a lower H<sub>2</sub>-production rate, the process for synthesis is facile, and no noble metal was used.

## References

1. Li, F.; Yang, J.; Gao, J.; Liu, Y.; Gong, Y. Enhanced photocatalytic hydrogen production of CdS embedded in cationic hydrogel. *Int. J. Hydrog. Energy* **2020**, *45*, 1969–1980.
2. Lu, J.; Zhang, X.; Gao, H.; Cui, W. Three-dimensional structure of PANI/CdS NRs-SiO<sub>2</sub> hydrogel for photocatalytic hydrogen evolution with high activity and stability. *Nanomaterials* **2019**, *9*, 427.
3. Lei, L.; Wang, W.; Wang, C.; Fan, H.; Yadav, A.K.; Hu, N.; Zhong, Q.; Buschbaum, P.M. hydrogel-supported graphitic carbon nitride nanosheets loaded with Pt atoms as a novel water-storage photocatalyst for H<sub>2</sub> evolution. *J. Mater. Chem. A* **2020**, *8*, 23812–23819.
4. Wang, J.; Cong, J.; Xu, H.; Wang, J.; Liu, H.; Liang, M.; Gao, J.; Ni, Q.; Yao, J. Facile gel-based morphological control of Ag/g-C<sub>3</sub>N<sub>4</sub> porous nanofibers for photocatalytic hydrogen generation. *ACS Sustain. Chem. Eng.* **2017**, *5*, 10633–10639.
5. Madhusudan, P.; Wang, Y.; Chandrashekar, B.N.; Wang, W.; Wang, J.; Miao, J.; Shi, R.; Liang, Y.; Mi, G.; Cheng, C. Nature inspired ZnO/ZnS nanobranched-like composites, decorated with Cu (OH)<sub>2</sub> clusters for enhanced visible-light photocatalytic hydrogen evolution. *Appl. Catal. B Environ.* **2019**, *253*, 379–390.
